# Supplementary material
Source: PubMed Central journal article supplement (PMC9996210)
Supplement: djac220_supplementary_data.pdf [file djac220_supplementary_data.pdf]

## **Supplementary Material**

### **Supplementary Methods**

#### **1. Cancer groups based on 5-year relative survival rate (S)**

##### Good survival group ( $S \geq 90\%$ )

Melanoma of the Skin, Other Non-Epithelial Skin, Breast, Thyroid

##### Moderate survival group ( $70\% \leq S < 90\%$ )

Nose, Nasal Cavity and Middle Ear, Larynx, Bones and Joints, Soft Tissue including Heart, Corpus Uteri, Urinary Bladder, Kidney and Renal Pelvis, Ureter, Other Urinary Organs, Eye and Orbit, Lymphoma, Kaposi Sarcoma

##### Fair survival group ( $50\% \leq S < 70\%$ )

Oral Cavity and Pharynx, Small Intestine, Colorectum, Anus, Anal Canal and Anorectum, Cervix Uteri, Vagina, Vulva, Other Female Genital Organs, Myeloma, Leukemia

##### Poor survival group ( $S < 50\%$ )

Esophagus, Stomach, Liver, Intrahepatic Bile Duct, Gallbladder, Other Biliary, Pancreas, Peritoneum, Other Digestive Organs, Lung and Bronchus, Other Respiratory Organs, Ovary, Brain, Cranial Nerves Other Nervous System, Mesothelioma

#### **2. Statistical analysis for cardiovascular disease (CVD) and all-cause mortality**

The cumulative incidence function (CIF) of CVD death by racial and ethnic groups was graphed for the first 10 years of follow-up. We also fitted the same three models as for cancer mortality considering competing risk of death from non-CVD conditions. Then we conducted subgroup analysis among patients with a second breast cancer, lung cancer, colorectal cancer, and uterine cancer separately. HRs for all-cause mortality comparing Hispanic, Non-Hispanic Asian, and Non-Hispanic Black to Non-Hispanic White survivors overall and by cancer types were quantified.

### **3. Association between race and ethnicity and mortality by age category**

The models for cancer and CVD mortality were stratified by age at SPC diagnosis ( $\leq 70$  and  $>70$  years) based on the median age in this study population as well as prior studies that have reported an increase in CVD mortality among breast cancer survivors over 70 years<sup>1,2</sup>. To study whether age at SPC diagnosis modified the association between race and ethnicity and mortality, we added an interaction term between age ( $\leq 70$  and  $>70$  years) and race and ethnicity to model 3. Likelihood ratio test (LRT) comparing models with and without interaction term was conducted to obtain p-value for interaction.

### **4. Sensitivity analysis**

(1) For cancer mortality, Cox model further adjusted for percent of residents below poverty (continuous) and rural/urban status (Model 4) and insurance (uninsured, Medicaid, insured) (Model 5). (2) Age was used as time scale in Cox model for cancer-specific and CVD-specific mortality (3) We used Fine and Gray competing risk models to quantify the subdistribution HRs for cancer-specific and CVD-specific mortality in fully adjusted model (model 3). (4) To reduce potential misclassification of recurrence being classified as a second primary breast cancer, analysis was restricted to women diagnosed of second breast cancer  $\geq 1$  year, and for ipsilateral and contralateral breast cancer separately. (5) We limited analyses to women who had local stage SPCs and quantified HRs for all-cause, cancer-specific, and CVD-specific mortality. (6) To investigate the secular trends of the racial and ethnic disparity, the association between race and ethnicity and cancer mortality was examined in each stratum of calendar years (2000-2004, 2005-2009, 2010-2014; given that we are studying multiple cancers, there is no specific cut point) among women diagnosed with SPCs within 5 years (because SPCs diagnosed between 2000-2004 were developed within 5 years by default, we applied this restriction to each period for fair comparison across calendar years). (7) Age 50 years was used as an alternative cutoff for the stratified analysis of cancer-specific mortality.

## Supplementary References

1. Ramin C, Schaeffer ML, Zheng Z, et al. All-Cause and Cardiovascular Disease Mortality among Breast Cancer Survivors in CLUE II, a Long-Standing Community-Based Cohort. *J Natl Cancer Inst.* 2021;113(2):137-145. doi:10.1093/jnci/djaa096
2. Bradshaw PT, Stevens J, Khankari N, Teitelbaum SL, Neugut AI, Gammon MD. Cardiovascular Disease Mortality Among Breast Cancer Survivors. *Epidemiology.* 2016;27(1):6. doi:10.1097/EDE.0000000000000394

## Supplementary Tables

Supplementary Table 1. Characteristics of the first breast cancer among survivors diagnosed with SPCs by race and ethnicity.

|                                    | Hispanic<br>(n=3197) | Non-Hispanic<br>Asian<br>(n=2146) | Non-Hispanic<br>Black<br>(n=4227) | Non-Hispanic<br>White<br>(n=29459) |
|------------------------------------|----------------------|-----------------------------------|-----------------------------------|------------------------------------|
| Age at diagnosis, Mean (SD), years | 57.2 (13.6)          | 58.5 (13.1)                       | 58.5 (13.5)                       | 63.6 (12.8)                        |
| Tumor stage                        |                      |                                   |                                   |                                    |
| Local                              | 1883<br>(58.9%)      | 1424 (66.4%)                      | 2509 (59.4%)                      | 20156 (68.4%)                      |
| Regional                           | 1158<br>(36.2%)      | 634 (29.5%)                       | 1486 (35.2%)                      | 8353 (28.4%)                       |
| Distant                            | 96 (3.0%)            | 58 (2.7%)                         | 130 (3.1%)                        | 559 (1.9%)                         |
| Missing                            | 60 (1.9%)            | 30 (1.4%)                         | 102 (2.4%)                        | 391 (1.3%)                         |
| Estrogen receptor status           |                      |                                   |                                   |                                    |
| Positive                           | 2043<br>(63.9%)      | 1505 (70.1%)                      | 2385 (56.4%)                      | 21255 (72.2%)                      |
| Negative                           | 757<br>(23.7%)       | 428 (19.9%)                       | 1231 (29.1%)                      | 4934 (16.7%)                       |
| Missing                            | 397<br>(12.4%)       | 213 (9.9%)                        | 611 (14.5%)                       | 3270 (11.1%)                       |
| Surgery                            |                      |                                   |                                   |                                    |
| Yes                                | 3050<br>(95.4%)      | 2072 (96.6%)                      | 3948 (93.4%)                      | 28505 (96.8%)                      |
| No/unknown                         | 147 (4.6%)           | 74 (3.4%)                         | 279 (6.6%)                        | 954 (3.2%)                         |
| Chemotherapy                       |                      |                                   |                                   |                                    |
| Yes                                | 1540<br>(48.2%)      | 886 (41.3%)                       | 1998 (47.3%)                      | 10080 (34.2%)                      |
| No/unknown                         | 1657<br>(51.8%)      | 1260 (58.7%)                      | 2229 (52.7%)                      | 19379 (65.8%)                      |
| Radiation                          |                      |                                   |                                   |                                    |
| Yes                                | 1611<br>(50.4%)      | 1078 (50.2%)                      | 2067 (48.9%)                      | 15985 (54.3%)                      |
| No/unknown                         | 1586<br>(49.6%)      | 1068 (49.8%)                      | 2160 (51.1%)                      | 13474 (45.7%)                      |

Abbreviation: SPC, second primary cancer.

Supplementary Table 2. Hazard ratios (95% confidence intervals) of death from cancer comparing Hispanic, Non-Hispanic Asian, and Non-Hispanic Black to Non-Hispanic White survivors, further adjusting for county attributes and health insurance status.

|                    | Model 4 <sup>a</sup> | Model 5 <sup>a</sup> |
|--------------------|----------------------|----------------------|
| Hispanic           | 1.08 (1.00,1.16)     | 1.07 (0.98,1.16)     |
| Non-Hispanic Asian | 0.93 (0.85,1.01)     | 0.92 (0.83,1.02)     |
| Non-Hispanic Black | 1.13 (1.06,1.20)     | 1.14 (1.06,1.22)     |
| Non-Hispanic White | 1.00 (Reference)     | 1.00 (Reference)     |

<sup>a</sup> Model 4: Model 3 + percent of residents below poverty and rural/urban status of the county; Model 5: Model 4 + health insurance status (uninsured, Medicaid, insured, this variable is available since 2007)

Supplementary Table 3. Hazard ratios (95% confidence intervals) of cancer death comparing Hispanic, Non-Hispanic Asian, and Non-Hispanic Black to Non-Hispanic White breast cancer patients who did not develop a second primary cancer.

|                    | Number of BC survivors without SPC | Person months | Number of deaths | HR (95%CI) <sup>a</sup> |
|--------------------|------------------------------------|---------------|------------------|-------------------------|
| Hispanic           | 61664                              | 4780003.5     | 9262             | 1.07<br>(1.04,1.10)     |
| Non-Hispanic Asian | 42401                              | 3547372       | 4599             | 0.86<br>(0.83,0.89)     |
| Non-Hispanic Black | 63578                              | 4712587       | 15122            | 1.33<br>(1.30,1.35)     |
| Non-Hispanic White | 424584                             | 36947005.5    | 62178            | 1.00<br>(Reference)     |

Abbreviation: BC, breast cancer; SPC, second primary cancer; HR, hazard ratio; CI, confidence interval.

<sup>a</sup> Models adjusted for age at diagnosis, year of diagnosis, tumor stage, treatment (surgery, chemotherapy, and radiation therapy), estrogen receptor status, marital status, median household income, % <9<sup>th</sup> grade, and region of registry.

Supplementary Table 4. Hazard ratios (95% confidence intervals) of death from cancer comparing Hispanic, Non-Hispanic Asian, and Non-Hispanic Black to Non-Hispanic White survivors who developed a second breast cancer (BC)  $\geq 1$  year since first diagnosis overall and by laterality.

|                    | Overall <sup>a</sup> | Ipsilateral <sup>a</sup> | Contralateral <sup>a</sup> |
|--------------------|----------------------|--------------------------|----------------------------|
| Hispanic           | 1.22 (1.05,1.42)     | 1.65 (1.24,2.21)         | 1.08 (0.90,1.28)           |
| Non-Hispanic Asian | 0.85 (0.69,1.04)     | 1.00 (0.63,1.59)         | 0.78 (0.62,0.98)           |
| Non-Hispanic Black | 1.29 (1.14,1.46)     | 1.48 (1.16,1.90)         | 1.21 (1.05,1.40)           |
| Non-Hispanic White | 1.00 (Reference)     | 1.00 (Reference)         | 1.00 (Reference)           |

<sup>a</sup> Models adjusted for age at diagnosis of second BC, year of diagnosis of second BC, tumor stage of second BC, ER status of second BC, treatment of second BC (surgery, chemotherapy, and radiation therapy), marital status, median household income, %  $< 9^{\text{th}}$  grade, region of registry at second BC diagnosis, age at diagnosis of first BC, tumor stage of first BC, estrogen receptor status of first BC, and treatment of first BC (surgery, chemotherapy, and radiation therapy).

Supplementary Table 5. Hazard ratios (95% confidence intervals) of cancer death comparing Hispanic, Non-Hispanic Asian, and Non-Hispanic Black to Non-Hispanic White survivors among second breast cancer patients by hormone receptor status and subtype of first and second breast cancer.

|                                          | Number of second BC | Number of deaths | Hazard ratio (95%CI) <sup>a</sup> |
|------------------------------------------|---------------------|------------------|-----------------------------------|
| <b>By first and second BC HR status</b>  |                     |                  |                                   |
| <b>First HR+, second HR+</b>             |                     |                  |                                   |
| Hispanic                                 | 629                 | 161              | 1.22 (1.01,1.48)                  |
| Non-Hispanic Asian                       | 448                 | 81               | 1.05 (0.82,1.34)                  |
| Non-Hispanic Black                       | 712                 | 189              | 1.32 (1.11,1.57)                  |
| Non-Hispanic White                       | 5266                | 861              | 1.00 (Reference)                  |
| <b>First HR+, second HR-</b>             |                     |                  |                                   |
| Hispanic                                 | 147                 | 46               | 1.32 (0.92,1.90)                  |
| Non-Hispanic Asian                       | 102                 | 18               | 0.99 (0.60,1.63)                  |
| Non-Hispanic Black                       | 224                 | 78               | 1.66 (1.25,2.20)                  |
| Non-Hispanic White                       | 1023                | 243              | 1.00 (Reference)                  |
| <b>First HR-, second HR+</b>             |                     |                  |                                   |
| Hispanic                                 | 118                 | 19               | 1.01 (0.58,1.75)                  |
| Non-Hispanic Asian                       | 85                  | 12               | 0.79 (0.42,1.50)                  |
| Non-Hispanic Black                       | 206                 | 45               | 1.24 (0.83,1.87)                  |
| Non-Hispanic White                       | 926                 | 138              | 1.00 (Reference)                  |
| <b>First HR-, second HR-</b>             |                     |                  |                                   |
| Hispanic                                 | 209                 | 78               | 0.95 (0.70,1.29)                  |
| Non-Hispanic Asian                       | 81                  | 21               | 0.58 (0.35,0.99)                  |
| Non-Hispanic Black                       | 368                 | 145              | 0.99 (0.78,1.25)                  |
| Non-Hispanic White                       | 743                 | 270              | 1.00 (Reference)                  |
| <b>By second BC subtype <sup>b</sup></b> |                     |                  |                                   |
| <b>HR+ and HER2- (Luminal A)</b>         |                     |                  |                                   |
| Hispanic                                 | 437                 | 73               | 1.32 (0.98,1.79)                  |
| Non-Hispanic Asian                       | 308                 | 34               | 1.14 (0.76,1.72)                  |
| Non-Hispanic Black                       | 524                 | 99               | 1.36 (1.03,1.79)                  |
| Non-Hispanic White                       | 3603                | 358              | 1.00 (Reference)                  |
| <b>HR+/- and HER2+ (HER2 positive)</b>   |                     |                  |                                   |
| Hispanic                                 | 118                 | 30               | 1.78 (1.09,2.92)                  |
| Non-Hispanic Asian                       | 85                  | 12               | 0.96 (0.47,1.97)                  |
| Non-Hispanic Black                       | 164                 | 40               | 1.13 (0.69,1.85)                  |
| Non-Hispanic White                       | 694                 | 114              | 1.00 (Reference)                  |
| <b>HR- and HER2- (Triple negative)</b>   |                     |                  |                                   |
| Hispanic                                 | 159                 | 44               | 1.19 (0.77,1.83)                  |
| Non-Hispanic Asian                       | 67                  | 17               | 1.35 (0.76,2.40)                  |
| Non-Hispanic Black                       | 274                 | 75               | 1.21 (0.88,1.68)                  |
| Non-Hispanic White                       | 726                 | 151              | 1.00 (Reference)                  |

Abbreviation: BC, breast cancer; HR, hormone receptor; HER2, human epidermal growth factor receptor 2; HR+, estrogen receptor positive or progesterone receptor positive; HR-, estrogen receptor negative and progesterone receptor negative.

<sup>a</sup> Models adjusted for age at diagnosis of second BC, year of diagnosis of second BC, tumor stage of second BC, treatment of second BC (surgery, chemotherapy, and radiation therapy), marital status, median household income, % <9<sup>th</sup> grade, region of registry at second BC diagnosis, age at diagnosis of first BC, tumor stage of first BC, hormone receptor status of first BC (only for models stratified by second BC subtype), and treatment of first BC (surgery, chemotherapy, and radiation therapy).

<sup>b</sup> Limited to survivors who diagnosed of a second breast cancer ≥ 2010, when HER2 status is available.

Supplementary Table 6. Hazard ratios (95% confidence intervals) of death from specific SPC and first breast cancer comparing Hispanic, Non-Hispanic Asian, and Non-Hispanic Black to Non-Hispanic White survivors among 3 most common non-breast SPC patients.

|                          | Death from SPC   |                      |                      |                      | Death from first BC |                      |                      |                      |
|--------------------------|------------------|----------------------|----------------------|----------------------|---------------------|----------------------|----------------------|----------------------|
|                          | Number of deaths | Model 1 <sup>a</sup> | Model 2 <sup>a</sup> | Model 3 <sup>a</sup> | Number of deaths    | Model 1 <sup>a</sup> | Model 2 <sup>a</sup> | Model 3 <sup>a</sup> |
| Second lung cancer       |                  |                      |                      |                      |                     |                      |                      |                      |
| Hispanic                 | 109              | 0.85<br>(0.70,1.03)  | 0.77<br>(0.63,0.95)  | 0.75<br>(0.59,0.95)  | 59                  | 1.67<br>(1.28,2.19)  | 1.41<br>(1.04,1.90)  | 1.16<br>(0.82,1.65)  |
| Non-Hispanic Asian       | 72               | 0.67<br>(0.53,0.84)  | 0.59<br>(0.45,0.77)  | 0.62<br>(0.47,0.82)  | 34                  | 1.04<br>(0.74,1.48)  | 1.02<br>(0.69,1.49)  | 0.89<br>(0.57,1.38)  |
| Non-Hispanic Black       | 203              | 0.91<br>(0.79,1.05)  | 0.73<br>(0.63,0.86)  | 0.73<br>(0.62,0.87)  | 93                  | 1.52<br>(1.22,1.89)  | 1.10<br>(0.86,1.41)  | 1.05<br>(0.80,1.38)  |
| Non-Hispanic White       | 2221             | 1.00<br>(Reference)  | 1.00<br>(Reference)  | 1.00<br>(Reference)  | 566                 | 1.00<br>(Reference)  | 1.00<br>(Reference)  | 1.00<br>(Reference)  |
| Second colorectal cancer |                  |                      |                      |                      |                     |                      |                      |                      |
| Hispanic                 | 51               | 1.18<br>(0.89,1.57)  | 1.23<br>(0.91,1.67)  | 1.13<br>(0.81,1.59)  | 15                  | 1.00<br>(0.59,1.70)  | 1.06<br>(0.61,1.86)  | 1.34<br>(0.76,2.37)  |
| Non-Hispanic Asian       | 37               | 0.94<br>(0.68,1.32)  | 1.04<br>(0.73,1.50)  | 1.11<br>(0.77,1.61)  | 6                   | 0.39<br>(0.17,0.87)  | 0.48<br>(0.21,1.09)  | 0.56<br>(0.25,1.29)  |
| Non-Hispanic Black       | 103              | 1.41<br>(1.14,1.74)  | 1.17<br>(0.93,1.47)  | 1.13<br>(0.88,1.45)  | 42                  | 1.60<br>(1.14,2.24)  | 1.32<br>(0.91,1.91)  | 1.19<br>(0.78,1.80)  |
| Non-Hispanic White       | 647              | 1.00<br>(Reference)  | 1.00<br>(Reference)  | 1.00<br>(Reference)  | 207                 | 1.00<br>(Reference)  | 1.00<br>(Reference)  | 1.00<br>(Reference)  |
| Second uterine cancer    |                  |                      |                      |                      |                     |                      |                      |                      |
| Hispanic                 | 26               | 1.26<br>(0.84,1.88)  | 1.33<br>(0.85,2.08)  | 1.12<br>(0.68,1.85)  | 13                  | 1.41<br>(0.79,2.50)  | 1.29<br>(0.66,2.52)  | 0.84<br>(0.38,1.87)  |
| Non-Hispanic Asian       | 26               | 1.14<br>(0.76,1.71)  | 1.13<br>(0.72,1.77)  | 0.90<br>(0.53,1.52)  | 10                  | 1.04<br>(0.54,1.98)  | 1.18<br>(0.59,2.39)  | 0.87<br>(0.39,1.92)  |
| Non-Hispanic Black       | 57               | 1.81<br>(1.36,2.41)  | 1.26<br>(0.90,1.74)  | 1.31<br>(0.91,1.89)  | 24                  | 1.91<br>(1.23,2.97)  | 1.43<br>(0.87,2.37)  | 1.26<br>(0.72,2.21)  |
| Non-Hispanic White       | 303              | 1.00<br>(Reference)  | 1.00<br>(Reference)  | 1.00<br>(Reference)  | 134                 | 1.00<br>(Reference)  | 1.00<br>(Reference)  | 1.00<br>(Reference)  |

Abbreviation: SPC, second primary cancer; BC, breast cancer; HR, hazard ratio; CI, confidence interval.

<sup>a</sup> Model 1 adjusted for age at diagnosis of SPC, and year of diagnosis of SPC; Model 2: Model 1 + tumor stage of SPC, treatment of SPC (surgery, chemotherapy, and radiation therapy), marital status, median household income, % <9<sup>th</sup> grade, and region of registry at SPC diagnosis; Model 3: Model 2 + age at diagnosis of first breast cancer, tumor stage of first breast cancer, estrogen receptor status of first breast cancer, treatment of first breast cancer (surgery, chemotherapy, and radiation therapy)

Supplementary Table 7. Hazard ratios (95% confidence intervals) of death from all causes comparing Hispanic, Non-Hispanic Asian, and Non-Hispanic Black to Non-Hispanic White survivors overall by type of SPCs.

|                                   | Number of deaths | Model 1 <sup>a</sup> | Model 2 <sup>a</sup> | Model 3 <sup>a</sup> |
|-----------------------------------|------------------|----------------------|----------------------|----------------------|
| All SPCs                          |                  |                      |                      |                      |
| Hispanic                          | 1471             | 1.20 (1.14,1.27)     | 1.12 (1.05,1.19)     | 1.08 (1.01,1.15)     |
| Non-Hispanic Asian                | 826              | 0.86 (0.80,0.92)     | 0.90 (0.83,0.97)     | 0.89 (0.82,0.97)     |
| Non-Hispanic Black                | 2289             | 1.46 (1.40,1.53)     | 1.20 (1.14,1.26)     | 1.13 (1.07,1.19)     |
| Non-Hispanic White                | 14614            | 1.00 (Reference)     | 1.00 (Reference)     | 1.00 (Reference)     |
| Second breast cancer <sup>b</sup> |                  |                      |                      |                      |
| Hispanic                          | 498              | 1.41 (1.28,1.55)     | 1.19 (1.06,1.34)     | 1.17 (1.03,1.33)     |
| Non-Hispanic Asian                | 218              | 0.83 (0.72,0.95)     | 0.82 (0.70,0.96)     | 0.78 (0.66,0.92)     |
| Non-Hispanic Black                | 847              | 1.76 (1.63,1.90)     | 1.30 (1.18,1.42)     | 1.30 (1.17,1.44)     |
| Non-Hispanic White                | 3199             | 1.00 (Reference)     | 1.00 (Reference)     | 1.00 (Reference)     |
| Second lung cancer                |                  |                      |                      |                      |
| Hispanic                          | 202              | 1.06 (0.92,1.22)     | 0.95 (0.81,1.11)     | 0.90 (0.76,1.07)     |
| Non-Hispanic Asian                | 126              | 0.76 (0.63,0.91)     | 0.69 (0.57,0.84)     | 0.69 (0.56,0.86)     |
| Non-Hispanic Black                | 363              | 1.09 (0.98,1.21)     | 0.85 (0.75,0.95)     | 0.82 (0.72,0.93)     |
| Non-Hispanic White                | 3331             | 1.00 (Reference)     | 1.00 (Reference)     | 1.00 (Reference)     |
| Second colorectal cancer          |                  |                      |                      |                      |
| Hispanic                          | 110              | 1.24 (1.02,1.50)     | 1.25 (1.01,1.54)     | 1.23 (0.98,1.55)     |
| Non-Hispanic Asian                | 62               | 0.74 (0.58,0.96)     | 0.79 (0.60,1.04)     | 0.80 (0.60,1.06)     |
| Non-Hispanic Black                | 208              | 1.39 (1.20,1.61)     | 1.18 (1.01,1.39)     | 1.14 (0.95,1.36)     |
| Non-Hispanic White                | 1405             | 1.00 (Reference)     | 1.00 (Reference)     | 1.00 (Reference)     |
| Second uterine cancer             |                  |                      |                      |                      |
| Hispanic                          | 54               | 1.22 (0.92,1.61)     | 1.26 (0.93,1.72)     | 0.97 (0.68,1.37)     |
| Non-Hispanic Asian                | 53               | 1.07 (0.81,1.42)     | 1.11 (0.82,1.51)     | 0.86 (0.60,1.23)     |
| Non-Hispanic Black                | 115              | 1.72 (1.41,2.10)     | 1.30 (1.04,1.62)     | 1.27 (0.99,1.63)     |
| Non-Hispanic White                | 734              | 1.00 (Reference)     | 1.00 (Reference)     | 1.00 (Reference)     |

Abbreviation: SPC, second primary cancer.

<sup>a</sup> Model 1 adjusted for age at diagnosis of SPC, year of diagnosis of SPC, and type of SPC (4 cancer groups based on 5-year relative survival rate. This is only for all SPC model); Model 2: Model 1 + tumor stage of SPC, treatment of SPC (surgery, chemotherapy, and radiation therapy), marital status, median household income, % <9<sup>th</sup> grade, and region of registry at SPC diagnosis; Model 3: Model 2 + age at diagnosis of first breast cancer, tumor stage of first breast cancer, estrogen receptor status of first breast cancer, treatment of first breast cancer (surgery, chemotherapy, and radiation therapy)

<sup>b</sup> Models 2&3 further adjusted for estrogen receptor status of the second breast cancer

Supplementary Table 8. Subdistribution hazard ratios (95% confidence intervals) from fully adjusted models <sup>a</sup>.

|                    | Cancer           | CVD              |
|--------------------|------------------|------------------|
| Hispanic           | 1.05 (0.97,1.14) | 0.98 (0.76,1.26) |
| Non-Hispanic Asian | 0.91 (0.83,1.00) | 0.87 (0.65,1.18) |
| Non-Hispanic Black | 1.11 (1.04,1.18) | 1.39 (1.17,1.68) |
| Non-Hispanic White | 1.00 (Reference) | 1.00 (Reference) |

Abbreviation: CVD, cardiovascular disease

<sup>a</sup> Models adjusted for age at diagnosis of SPC, year of diagnosis of SPC, 4 cancer groups based on 5-year relative survival rate, tumor stage of SPC, treatment of SPC (surgery, chemotherapy, and radiation therapy), marital status, median household income, % <9<sup>th</sup> grade, region of registry at SPC diagnosis, age at diagnosis of first breast cancer, tumor stage of first breast cancer, estrogen receptor status of first breast cancer, and treatment of first breast cancer (surgery, chemotherapy, and radiation therapy).

Supplementary Table 9. Hazard ratios (95% confidence intervals) using age as time scale <sup>a</sup>.

|                    | Cancer           | CVD              |
|--------------------|------------------|------------------|
| Hispanic           | 1.05 (0.98,1.13) | 1.00 (0.78,1.28) |
| Non-Hispanic Asian | 0.92 (0.84,1.01) | 0.84 (0.62,1.14) |
| Non-Hispanic Black | 1.12 (1.05,1.19) | 1.43 (1.19,1.73) |
| Non-Hispanic White | 1.00 (Reference) | 1.00 (Reference) |

Abbreviation: CVD, cardiovascular disease

<sup>a</sup> Models adjusted for year of diagnosis of SPC, 4 cancer groups based on 5-year relative survival rate, tumor stage of SPC, treatment of SPC (surgery, chemotherapy, and radiation therapy), marital status, median household income, % <9<sup>th</sup> grade, region of registry at SPC diagnosis, age at diagnosis of first breast cancer, tumor stage of first breast cancer, estrogen receptor status of first breast cancer, and treatment of first breast cancer (surgery, chemotherapy, and radiation therapy).

Supplementary Table 10. Hazard ratios (95% confidence intervals) of death overall, death from cancer, and death from cardiovascular disease (CVD) comparing Hispanic, Non-Hispanic Asian, and Non-Hispanic Black to Non-Hispanic White survivors who developed a local stage SPC.

|                    | Number of SPC | Person months | All-cause        |                      |                      |                      | Cancer           |                      |                      |                      | CVD              |                      |                      |                      |
|--------------------|---------------|---------------|------------------|----------------------|----------------------|----------------------|------------------|----------------------|----------------------|----------------------|------------------|----------------------|----------------------|----------------------|
|                    |               |               | Number of deaths | Model 1 <sup>a</sup> | Model 2 <sup>a</sup> | Model 3 <sup>a</sup> | Number of deaths | Model 1 <sup>a</sup> | Model 2 <sup>a</sup> | Model 3 <sup>a</sup> | Number of deaths | Model 1 <sup>a</sup> | Model 2 <sup>a</sup> | Model 3 <sup>a</sup> |
| Hispanic           | 1516          | 87084         | 383              | 1.18<br>(1.07,1.31)  | 1.06<br>(0.95,1.18)  | 1.02<br>(0.90,1.15)  | 275              | 1.28<br>(1.13,1.45)  | 1.08<br>(0.94,1.23)  | 1.02<br>(0.88,1.18)  | 50               | 1.14<br>(0.85,1.51)  | 1.03<br>(0.76,1.39)  | 0.97<br>(0.69,1.35)  |
| Non-Hispanic Asian | 1119          | 74801.5       | 202              | 0.70<br>(0.61,0.81)  | 0.75<br>(0.65,0.87)  | 0.73<br>(0.62,0.85)  | 131              | 0.70<br>(0.59,0.84)  | 0.75<br>(0.62,0.90)  | 0.77<br>(0.63,0.93)  | 35               | 0.84<br>(0.60,1.17)  | 0.87<br>(0.61,1.25)  | 0.69<br>(0.45,1.05)  |
| Non-Hispanic Black | 1907          | 107730        | 618              | 1.55<br>(1.43,1.69)  | 1.28<br>(1.17,1.41)  | 1.23<br>(1.11,1.36)  | 415              | 1.56<br>(1.41,1.74)  | 1.25<br>(1.11,1.40)  | 1.19<br>(1.05,1.35)  | 90               | 1.66<br>(1.33,2.07)  | 1.48<br>(1.17,1.86)  | 1.49<br>(1.15,1.93)  |
| Non-Hispanic White | 14894         | 938016        | 4542             | 1.00<br>(Reference)  | 1.00<br>(Reference)  | 1.00<br>(Reference)  | 2670             | 1.00<br>(Reference)  | 1.00<br>(Reference)  | 1.00<br>(Reference)  | 804              | 1.00<br>(Reference)  | 1.00<br>(Reference)  | 1.00<br>(Reference)  |

Abbreviation: SPC, second primary cancer.

<sup>a</sup> Model 1 adjusted for age at diagnosis of SPC, year of diagnosis of SPC, and type of SPC (4 cancer groups based on 5-year relative survival rate); Model 2: Model 1 + tumor stage of SPC, treatment of SPC (surgery, chemotherapy, and radiation therapy), marital status, median household income, % <9<sup>th</sup> grade, and region of registry at SPC diagnosis; Model 3: Model 2 + age at diagnosis of first breast cancer, tumor stage of first breast cancer, estrogen receptor status of first breast cancer, treatment of first breast cancer (surgery, chemotherapy, and radiation therapy)

Supplementary Table 11. Hazard ratios (95% confidence intervals) of death from cancer comparing Hispanic, Non-Hispanic Asian, and Non-Hispanic Black to Non-Hispanic White survivors by calendar time of SPC diagnosis <sup>a</sup>.

|                    | 2000-2004        | 2005-2009        | 2010-2014        |
|--------------------|------------------|------------------|------------------|
| Hispanic           | 0.90 (0.73,1.11) | 1.12 (0.98,1.28) | 1.13 (0.97,1.31) |
| Non-Hispanic Asian | 0.77 (0.60,0.99) | 0.86 (0.72,1.02) | 0.98 (0.81,1.18) |
| Non-Hispanic Black | 1.10 (0.93,1.31) | 1.24 (1.10,1.40) | 1.14 (1.01,1.29) |
| Non-Hispanic White | 1.00 (Reference) | 1.00 (Reference) | 1.00 (Reference) |

Abbreviation: SPC, second primary cancer.

<sup>a</sup> Models adjusted for age at diagnosis of SPC, year of diagnosis of SPC, 4 cancer groups based on 5-year relative survival rate, tumor stage of SPC, treatment of SPC (surgery, chemotherapy, and radiation therapy), marital status, median household income, % <9<sup>th</sup> grade, region of registry at SPC diagnosis, age at diagnosis of first breast cancer, tumor stage of first breast cancer, estrogen receptor status of first breast cancer, and treatment of first breast cancer (surgery, chemotherapy, and radiation therapy).

Supplementary Table 12. Hazard ratios (95% confidence intervals) of death from cancer comparing Hispanic, Non-Hispanic Asian, and Non-Hispanic Black to Non-Hispanic White survivors among women diagnosed of SPCs ≤50 years and >50 years of age.

|                    | Number of SPC | Person months | Number of deaths | Model 1 <sup>a</sup> | Model 2 <sup>a</sup> | Model 3 <sup>a</sup> |
|--------------------|---------------|---------------|------------------|----------------------|----------------------|----------------------|
| ≤50 years          |               |               |                  |                      |                      |                      |
| Hispanic           | 706           | 35765.5       | 266              | 1.54 (1.34,1.78)     | 1.21 (1.03,1.42)     | 1.09 (0.92,1.29)     |
| Non-Hispanic Asian | 385           | 25573         | 106              | 0.88 (0.72,1.08)     | 0.90 (0.72,1.13)     | 0.91 (0.71,1.15)     |
| Non-Hispanic Black | 768           | 43157         | 309              | 1.53 (1.34,1.75)     | 1.25 (1.08,1.45)     | 1.17 (0.99,1.38)     |
| Non-Hispanic White | 2662          | 176002.5      | 794              | 1.00 (Reference)     | 1.00 (Reference)     | 1.00 (Reference)     |
| >50 years          |               |               |                  |                      |                      |                      |
| Hispanic           | 2491          | 109207.5      | 987              | 1.17 (1.09,1.24)     | 1.09 (1.01,1.17)     | 1.03 (0.95,1.12)     |
| Non-Hispanic Asian | 1761          | 87829.5       | 591              | 0.90 (0.83,0.98)     | 0.94 (0.85,1.02)     | 0.93 (0.85,1.03)     |
| Non-Hispanic Black | 3459          | 139333.5      | 1565             | 1.43 (1.35,1.51)     | 1.17 (1.11,1.24)     | 1.11 (1.04,1.18)     |
| Non-Hispanic White | 26797         | 1261086       | 10499            | 1.00 (Reference)     | 1.00 (Reference)     | 1.00 (Reference)     |

Abbreviation: SPC, second primary cancer.

<sup>a</sup> Model 1 adjusted for age at diagnosis of SPC, year of diagnosis of SPC, and type of SPC (4 cancer groups based on 5-year relative survival rate); Model 2: Model 1 + tumor stage of SPC, treatment of SPC (surgery, chemotherapy, and radiation therapy), marital status, median household income, % <9<sup>th</sup> grade, and region of registry at SPC diagnosis; Model 3: Model 2 + age at diagnosis of first breast cancer, tumor stage of first breast cancer, estrogen receptor status of first breast cancer, treatment of first breast cancer (surgery, chemotherapy, and radiation therapy)
